# Supplementary material for: Green synthesis of fluorescent nitrogen/sulfur-doped carbon dots and investigation of their properties by HPLC coupled with mass spectrometry
Source: Royal Society of Chemistry journal article supplement (doi:10.1039/c4ra02170c), 2014-01-01
Supplement: c4ra02170c1.pdf [file c4ra02170c1.pdf]

## Electronic Supplementary Information

### Green synthesis of fluorescent nitrogen/sulfur-doped carbon dots and investigation of their properties by HPLC coupled with mass spectrometry

Qin Hu,<sup>a</sup> Man Chin Paa,<sup>a</sup> Yan Zhang,<sup>b</sup> Xiaojuan Gong,<sup>b,‡</sup> Lei Zhang,<sup>b,‡</sup> Dongtao Lu,<sup>b,‡</sup> Yang Liu,<sup>b,‡</sup> Qiaoling Liu,<sup>b,‡</sup> Jun Yao<sup>\*c</sup> and Martin M.F. Choi<sup>\*a</sup>

<sup>a</sup>Partner State Key Laboratory of Environmental and Biological Analysis, and Department of Chemistry, Hong Kong Baptist University, 224 Waterloo Road, Kowloon Tong, Hong Kong SAR, China. E-mail: mfchoi@hkbu.edu.hk

<sup>b</sup>Institute of Environmental Science, and School of Chemistry and Chemical Engineering, Shanxi University, Taiyuan 030006, China.

<sup>c</sup>School of Civil & Environmental Engineering, and National International Cooperation Base on Environment and Energy, University of Science and Technology Beijing, 30 Xueyuan Road, 100083 Beijing, China. E-mail: yaojun@ustb.edu.cn

<sup>‡</sup>Exchange student on visit to Hong Kong Baptist University.

**Table S1.** Elemental analysis of the as-synthesised C-dots: **(A)** Elemental content and **(B)** relative number of atom in C-dots

| Type of C-dots | (A) Elemental content (%) |      |                |      |       |
|----------------|---------------------------|------|----------------|------|-------|
|                | C                         | H    | O (Calculated) | N    | S     |
| Undoped C-dots | 41.12                     | 6.35 | 52.05          | 0.39 | 0.092 |
| N,S-C-dots     | 40.93                     | 5.90 | 38.71          | 6.23 | 8.23  |

  

| Type of C-dots | (B) Relative number of atom |    |    |     |      |
|----------------|-----------------------------|----|----|-----|------|
|                | C                           | H  | O  | N   | S    |
| Undoped C-dots | 12                          | 22 | 12 | 0.1 | 0.01 |
| N,S-C-dots     | 13                          | 23 | 9  | 2   | 1    |

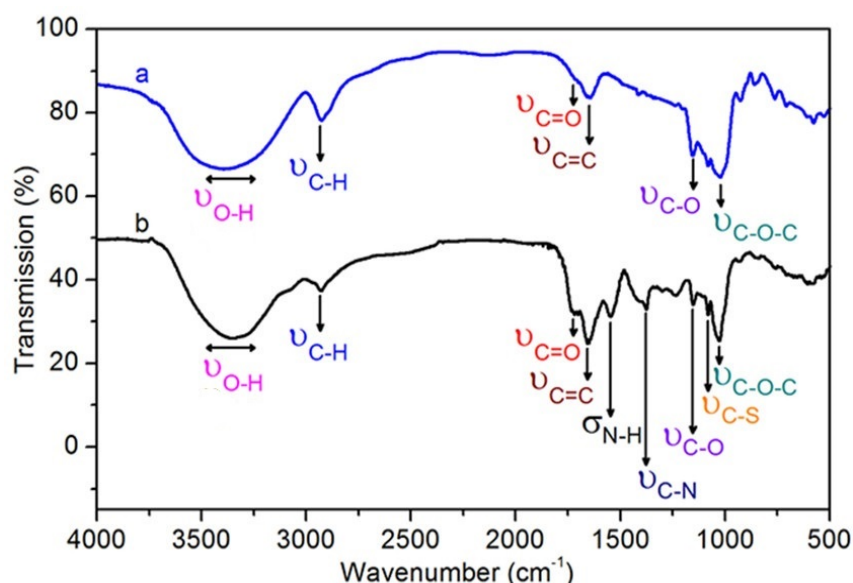

**Fig. S1.** FTIR spectra of (a) undoped C-dots and (b) N,S-C-dots.



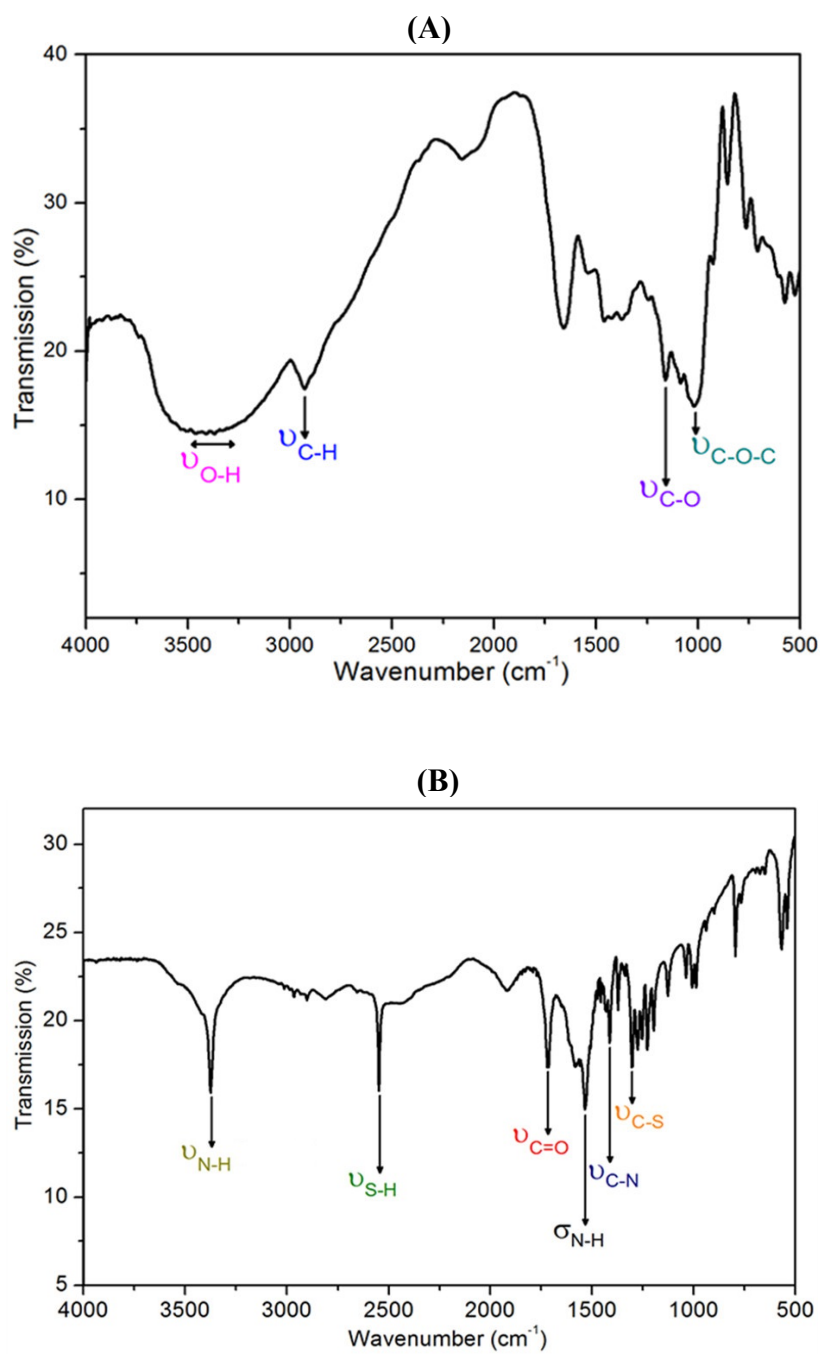

**Fig. S2.** FTIR spectra of (A) rice and (B) NAC.



## Measurement of quantum yield

Quantum yield ( $\Phi_S$ ) of the C-dots sample was determined by a comparative method. Quinine sulfate ( $\Phi_R = 0.54$ ) in 0.10 M H<sub>2</sub>SO<sub>4</sub> (refractive index,  $\eta = 1.33$ ) was selected as the reference to determine the  $\Phi_S$  of the C-dots sample in distilled water ( $\eta = 1.33$ ) at different concentrations. All the absorbances of the solutions at the excitation wavelength ( $\lambda_{ex}$ ) were recorded by a UV-vis absorption spectrophotometer (Varian, Palo Alto, CA, USA). PL spectra of C-dots were measured by a Photon Technology International QM4 spectrofluorometer (Birmingham, NJ, USA). The  $\lambda_{ex}$ /integrated PL intensity area under the PL curve in the wavelength range were 340/360–650 nm for undoped C-dots sample, 340/360–650 and 390/410–650 nm for *N,S*-C-dots sample, and 390/410–650 nm for *N,S*-C-dots HPLC fractions. Graphs of integrated PL intensity against absorbance were plotted. The  $\Phi_S$  of the C-dot sample was calculated as follows:

$$\Phi_S = \Phi_R (Grad_S / Grad_R) (\eta^2_S / \eta^2_R)$$

where the subscripts *S* and *R* denote the sample and reference, respectively. *Grad* is the gradient from the plot of integrated PL intensity against absorbance, and  $\eta$  is the refractive index of the solvent. In order to minimise the self-absorption effect, the absorbances in the 10-mm pathlength fluorescence cuvette should never exceed 0.050 at the excitation wavelength.<sup>1,2</sup>

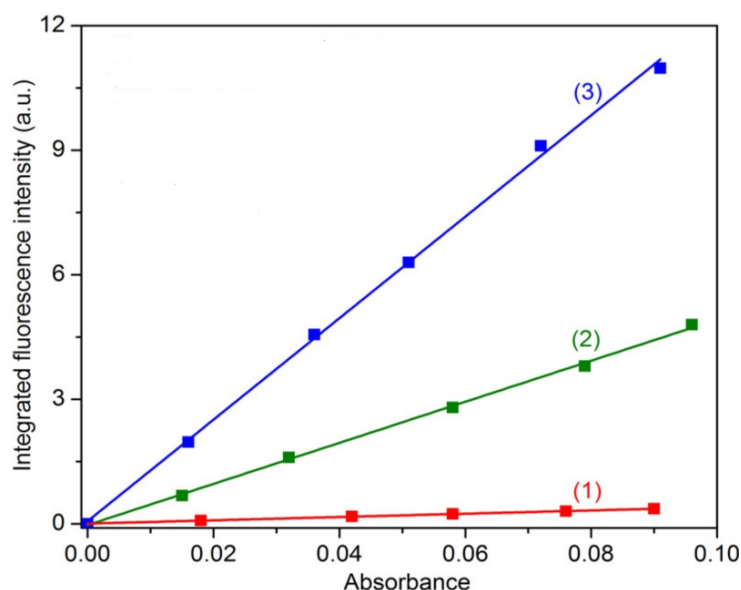

**Fig. S3.** Plots of integrated PL intensity against absorbance of C-dots: (1) undoped C-dots at  $\lambda_{ex}$  340 nm. (2) *N,S*-C-dots at  $\lambda_{ex}$  340 nm, and (3) *N,S*-C-dots at  $\lambda_{ex}$  390 nm. The gradients of quinine sulfate are 2298.5 and 2801.36 at  $\lambda_{ex}$  340 and 390 nm, respectively.

## References

- 1 S. Sahu, B. Behera, T.K. Maiti and S. Mohapatra, *Chem. Commun.*, 2012, **48**, 8835.
- 2 C. Liu, P. Zhang, F. Tian, W. Li, F. Li and W. Liu, *J. Mater. Chem.*, 2011, **21**, 13163.



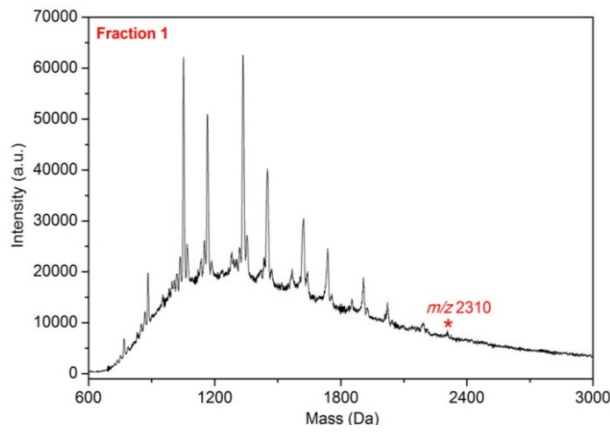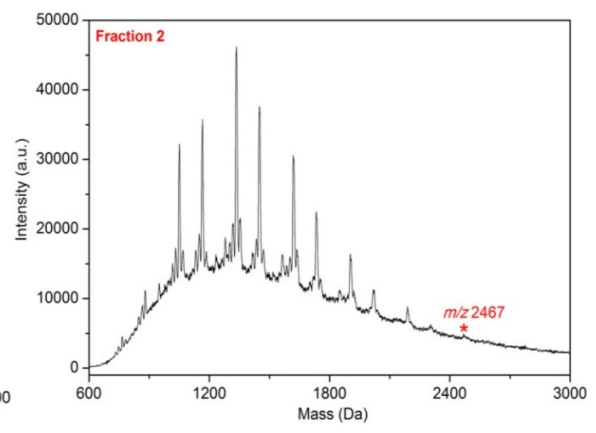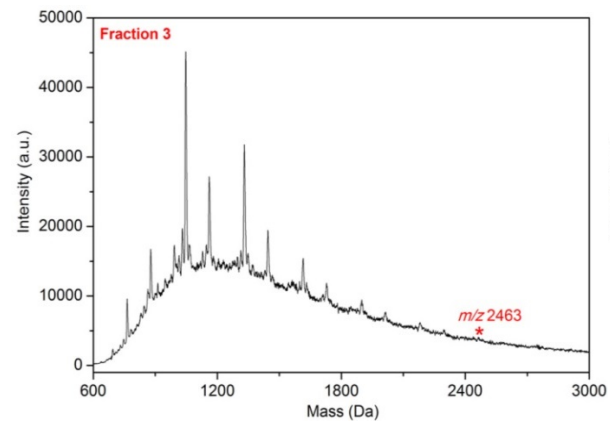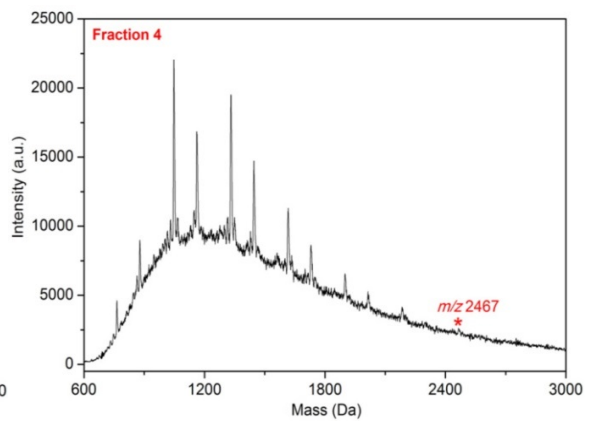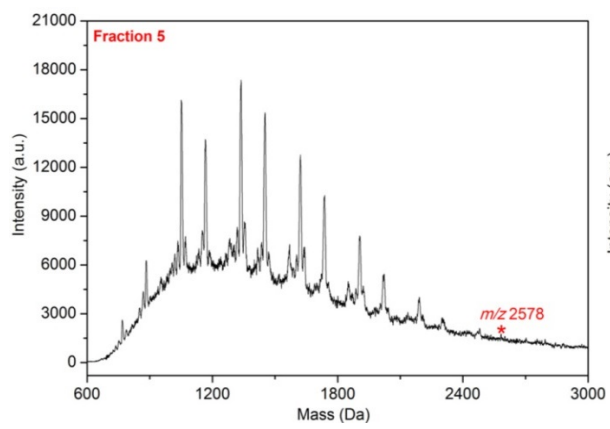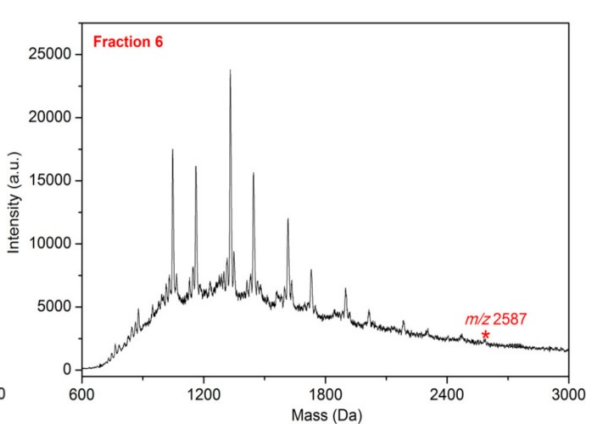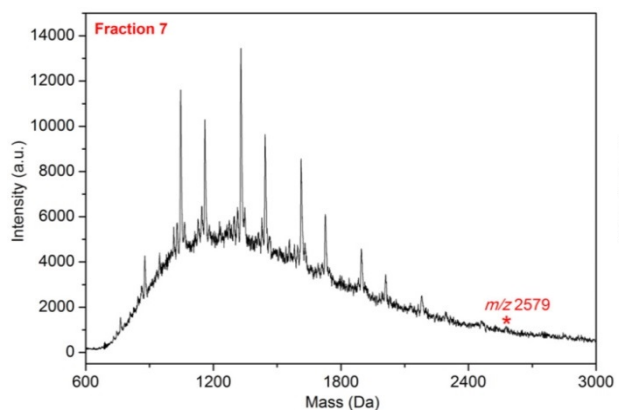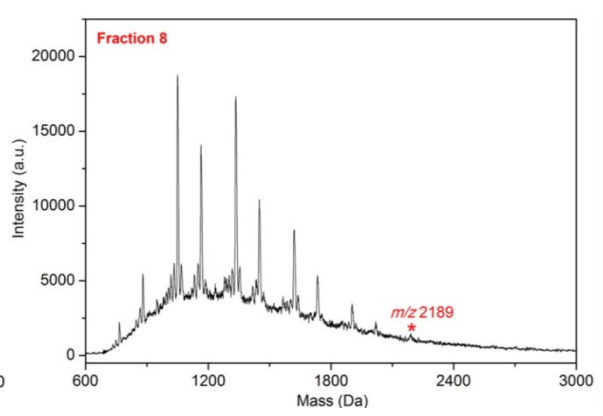



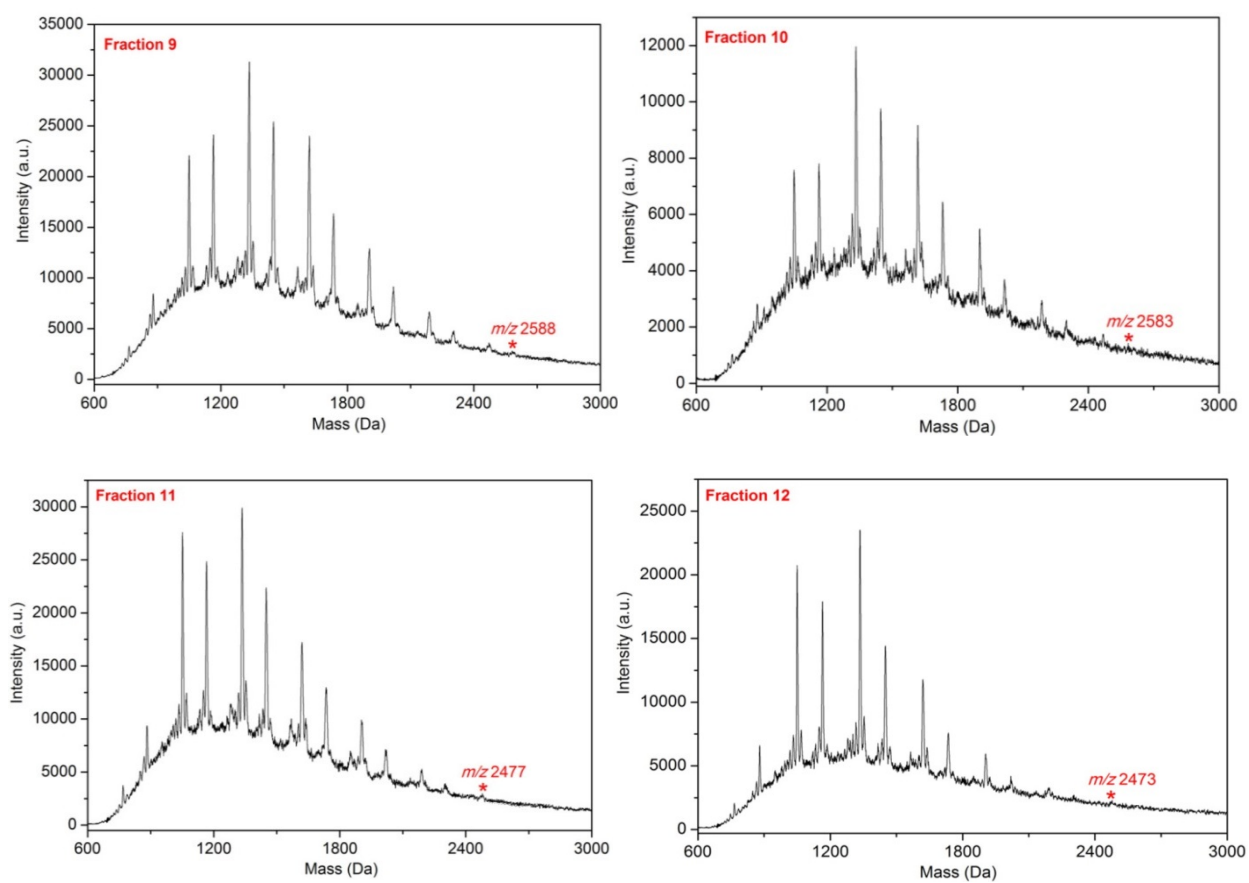

**Fig. S4.** MALDI-TOF MS of fractions 1–12 in *N,S*-C-dots.



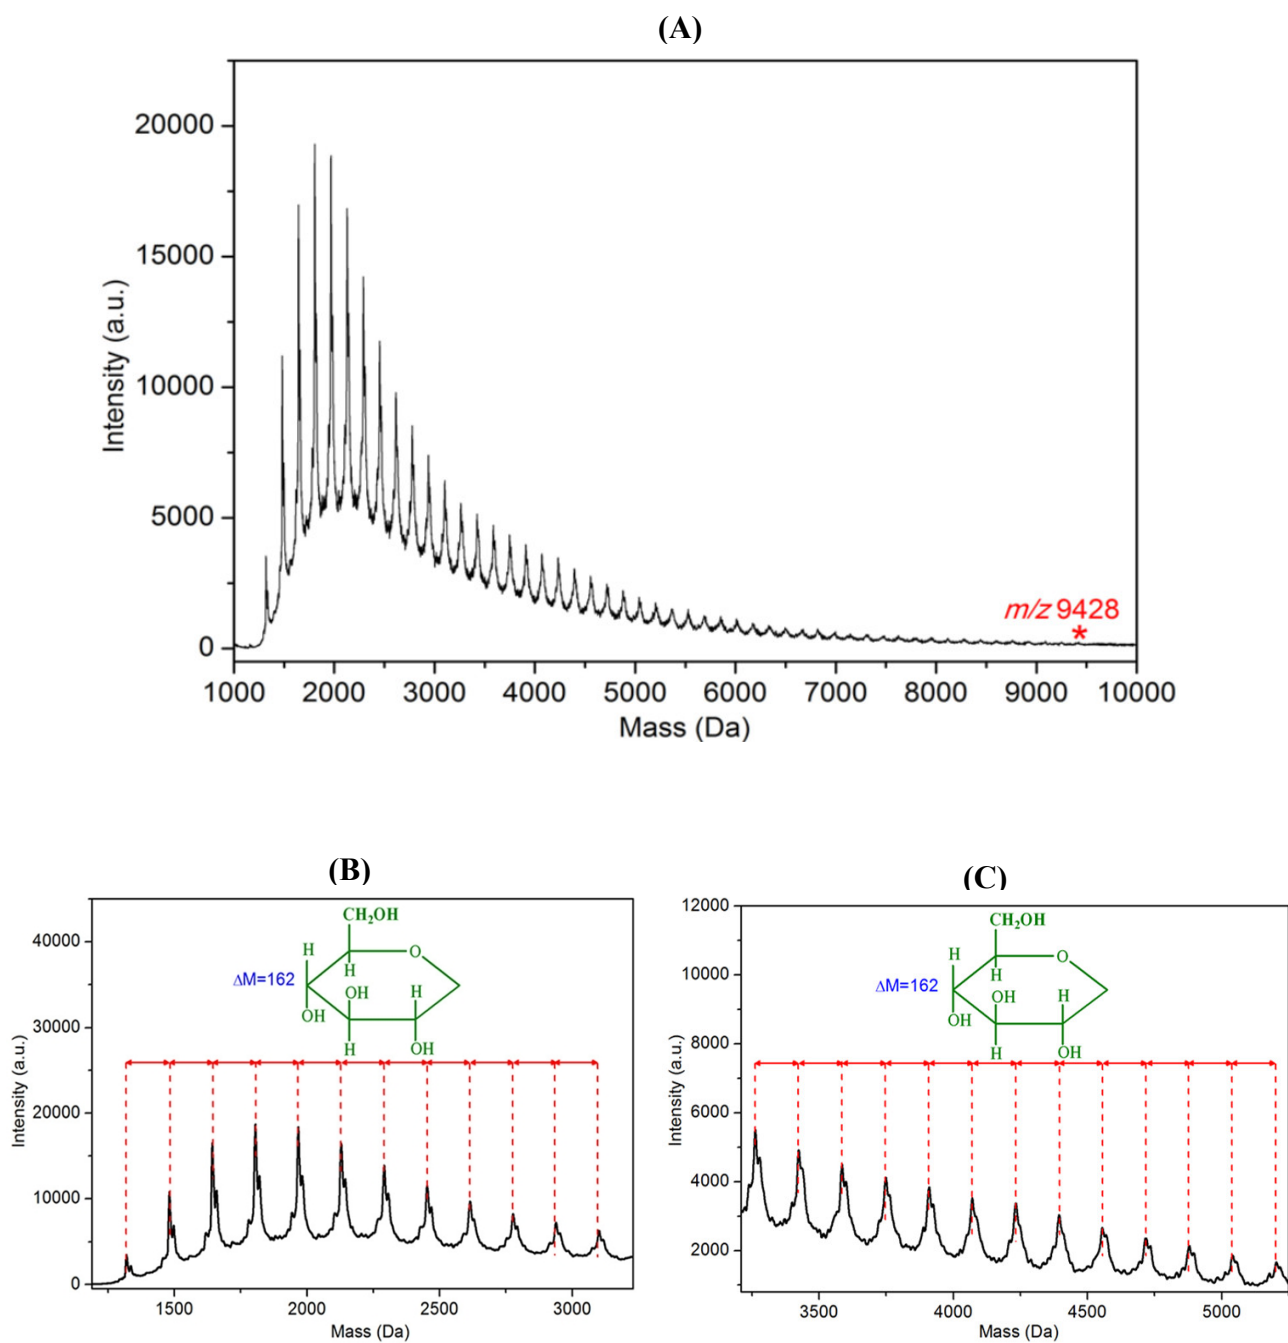

**Fig. S5.** (A) MALDI-TOF MS of rice. (B) Expanded MS in the mass range 1190–3230 Da. (C) Expanded MS in the mass range 3210–5250 Da.



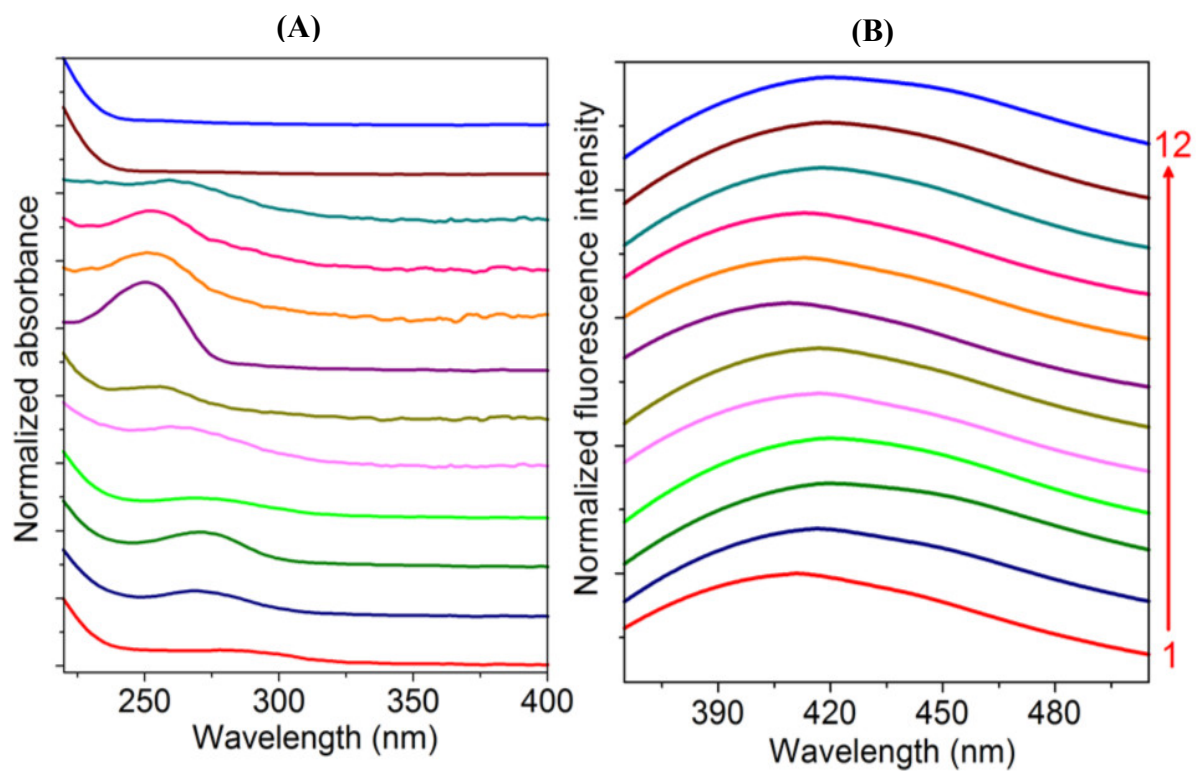

**Fig. S6.** (A) Absorption and (B) PL spectra at  $\lambda_{\text{ex}}$  340 nm of fractions 1–12 (from bottom to top) in the undoped C-dots in Fig. 5B.
